# Supplementary material for: Steep, coincident, and concordant clines in mitochondrial and nuclear‐encoded genes in a hybrid zone between subspecies of Atlantic killifish, Fundulus heteroclitus
Source: PubMed Central journal article supplement (PMC4983590; doi:10.1002/ece3.2324), 2016-07-22

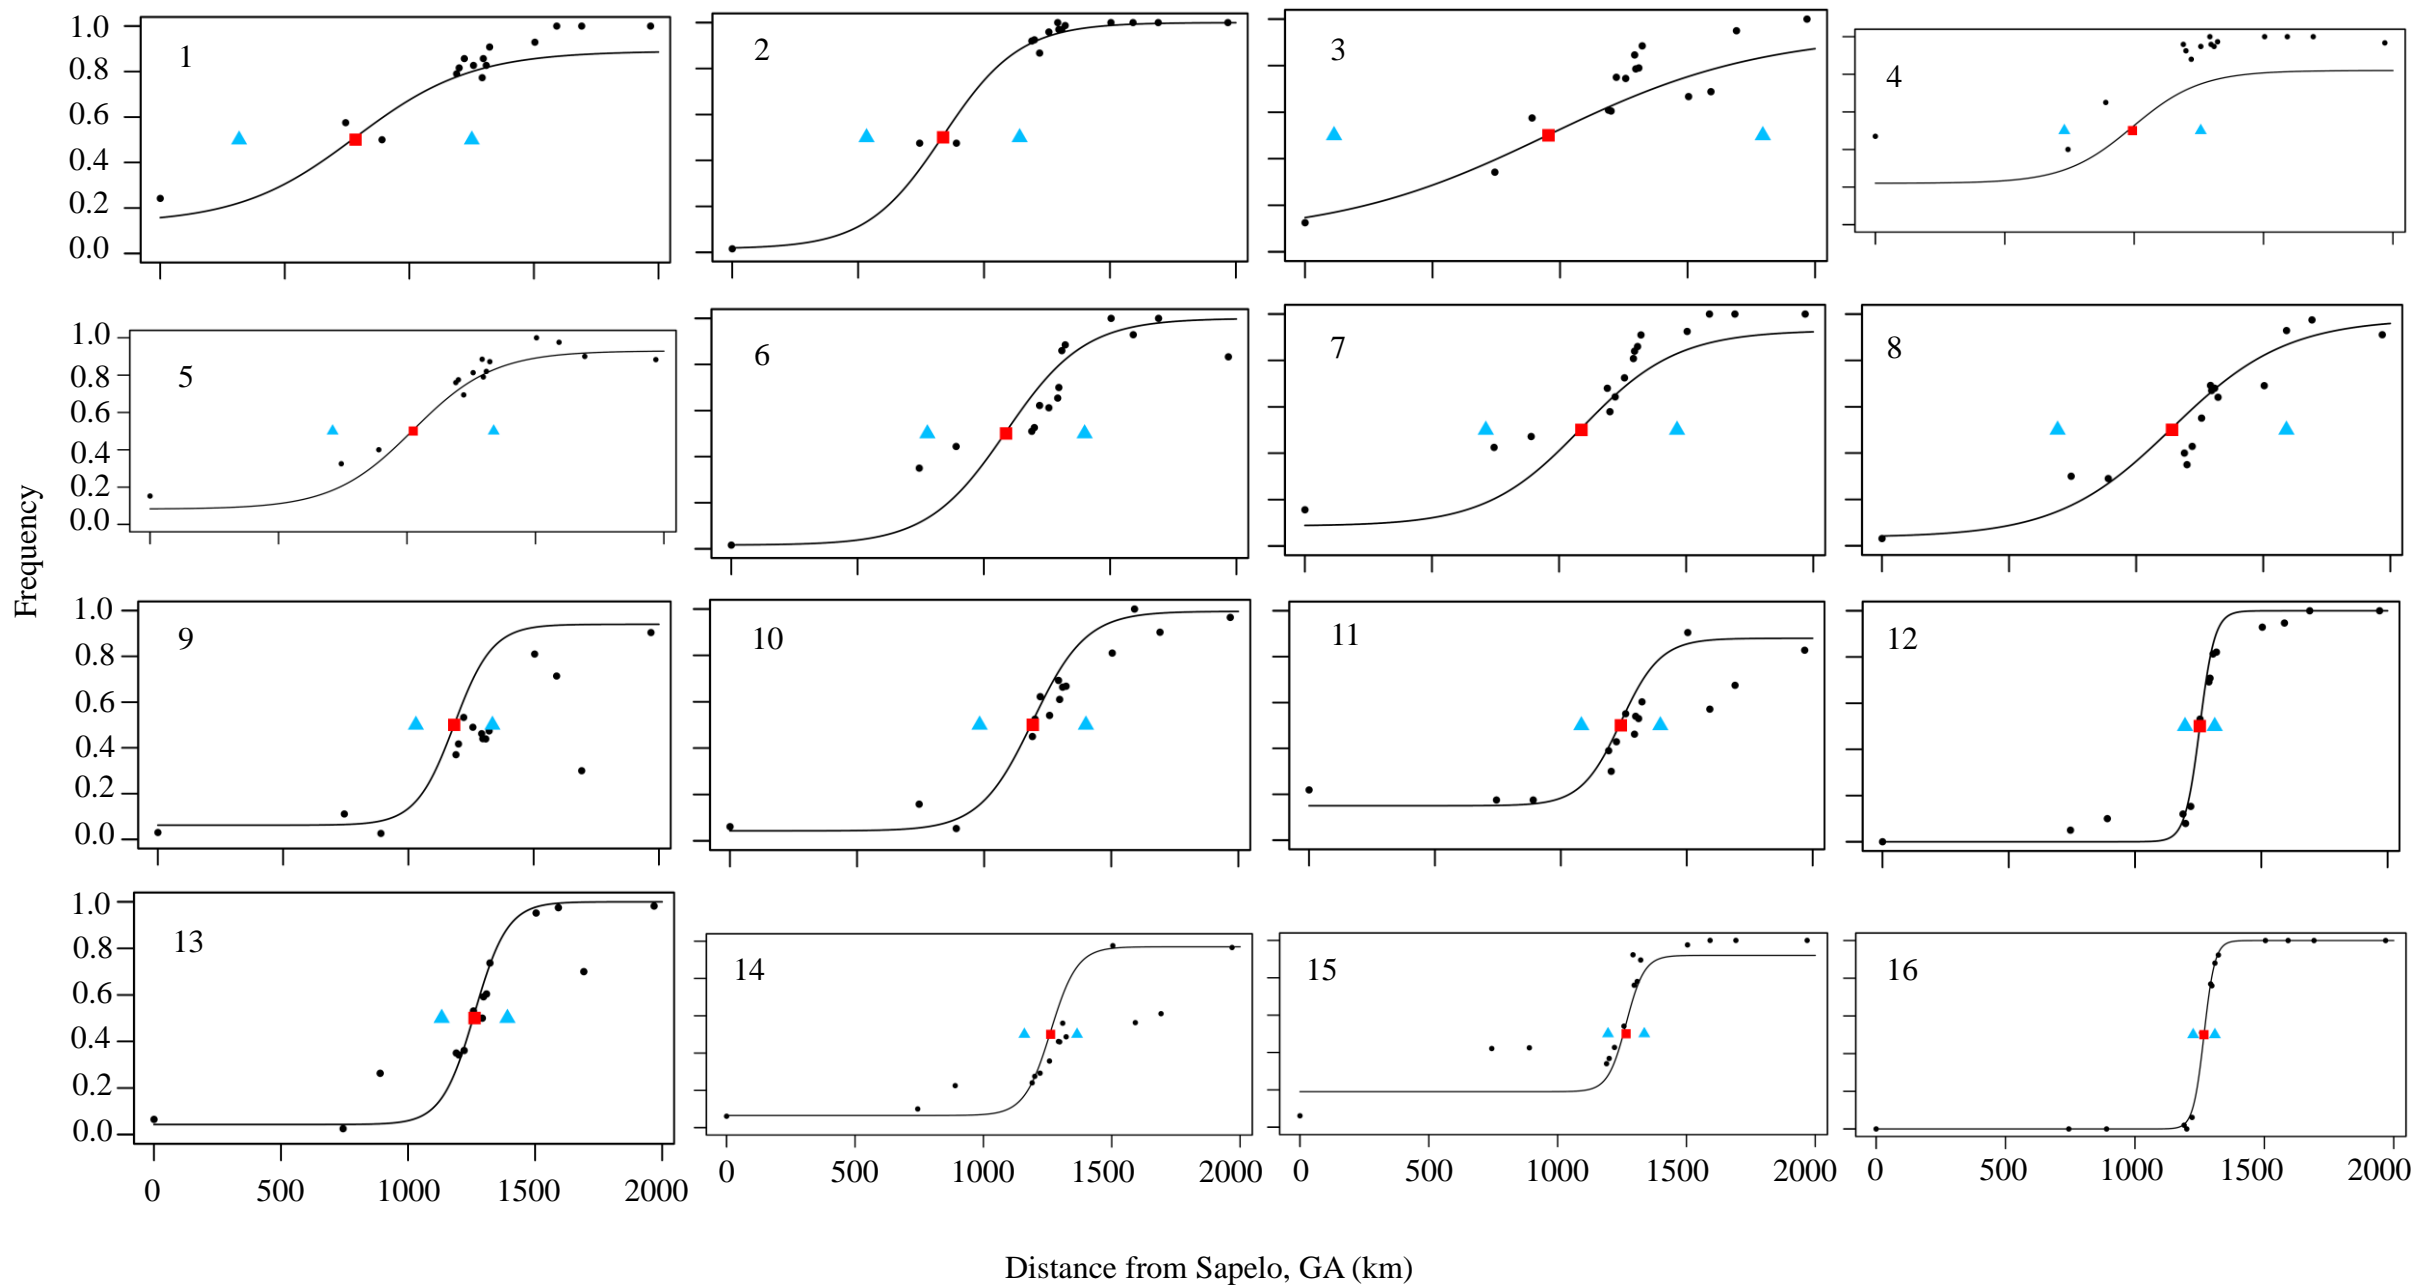

Frequency

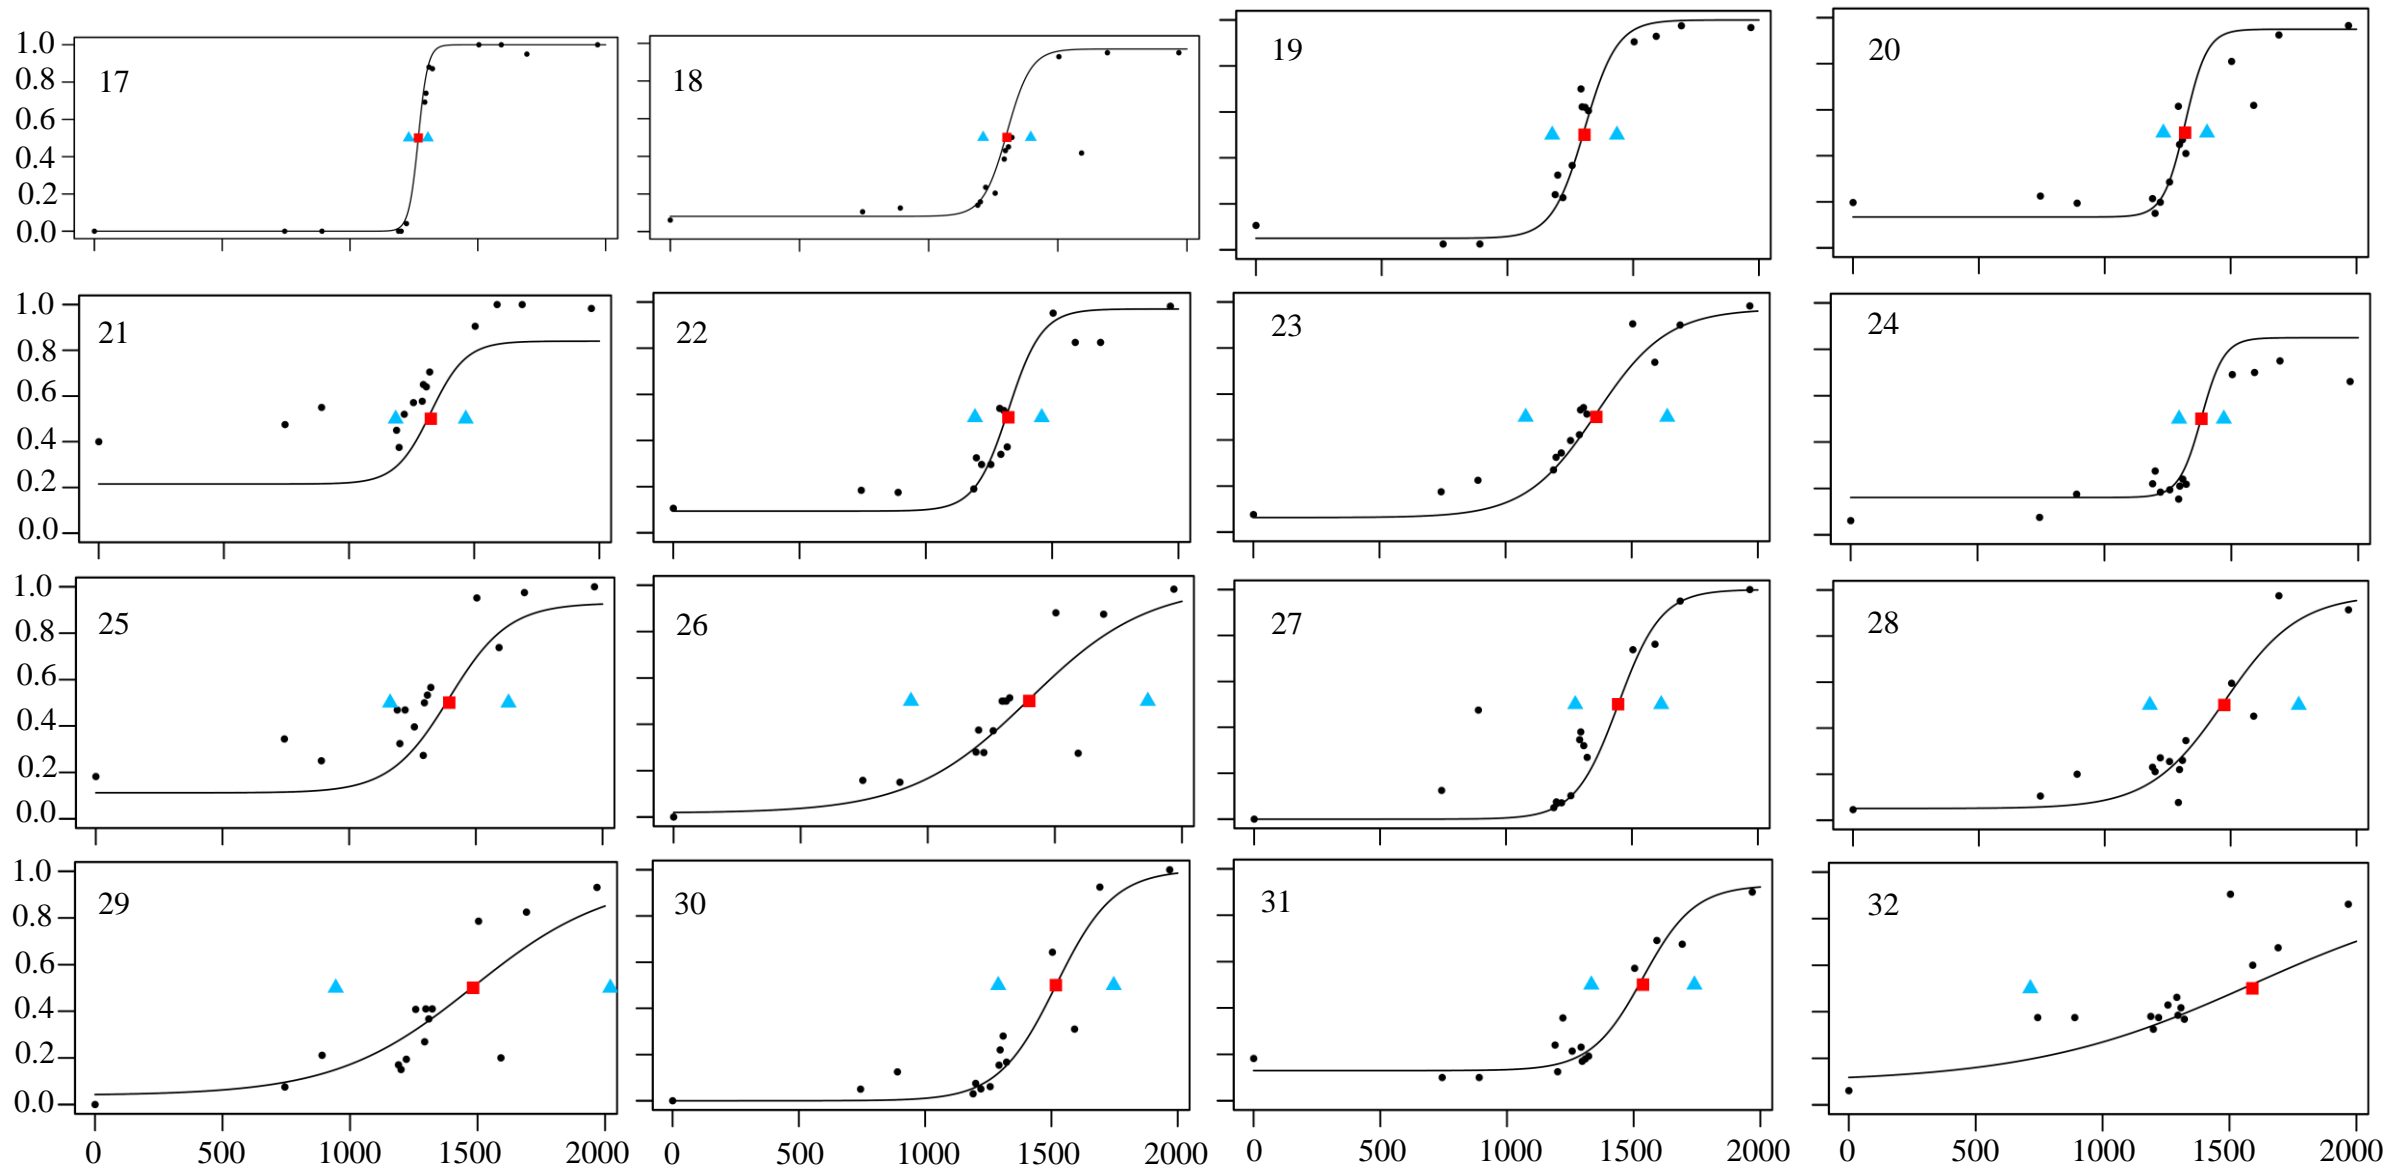

Distance from Sapelo, GA (km)

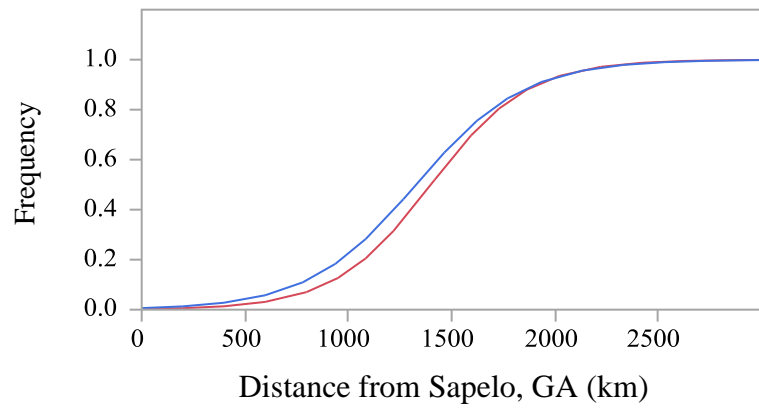

Supplement: ECE3-6-5771-s001.pdf [file ECE3-6-5771-s001.pdf]
